# Supplementary material
Source: Elsevier journal article supplement (https://www.sciencedirect.com/science/article/pii/S0009739X21001603)
Supplement: mmc2 [file S0009739X21001603:mmc2.doc]

**Anexo II.** *Check list* de cribado telefónico epidemiológico y clínico. Tomado del documento de consenso. Ministerio de Sanidad, mayo de 2020.

**Informe clínico:**

| **¿Ha presentado en las últimas 2 semanas?** | **Sí** | **No** |
| --- | --- | --- |
| **Fiebre mayor de 37°** |  |  |
| T**os seca** |  |  |
| **Dificultad respiratoria** |  |  |
| **Fatiga severa (cansancio)** |  |  |
| **Dolor muscular** |  |  |
| **Falta de olor** |  |  |
| **Falta de gusto** |  |  |
| **Diarrea, náuseas o vómitos** |  |  |
| **Alteraciones en los ojos, tipo conjuntivitis** |  |  |
| **Alguna lesión cutánea** |  |  |
| **Existe algún motivo que justifique los síntomas por parte del paciente:** | | |
| **¿Ha ACUDIDO al hospital, al centro de salud o LLAMADO al centro de atención por alguno de estos síntomas?** |  |  |
| **En caso afirmativo qué actitud le dijeron que tomara:** | | |
